# Supplementary material for: An Effortful Approach to Social Affiliation in Schizophrenia: Preliminary Evidence of Increased Theta and Alpha Connectivity during a Live Social Interaction
Source: MDPI journal article supplement (doi:10.3390/brainsci11101346), 2021-10-13

**Supplementary Materials for:**

**An Effortful Approach to Social Affiliation in Schizophrenia:**

**Preliminary Evidence of Increased Theta and Alpha Connectivity During a Live Social  
Interaction**

**Figure S1***Average Adjacency Matrix for the Delta Frequency Band*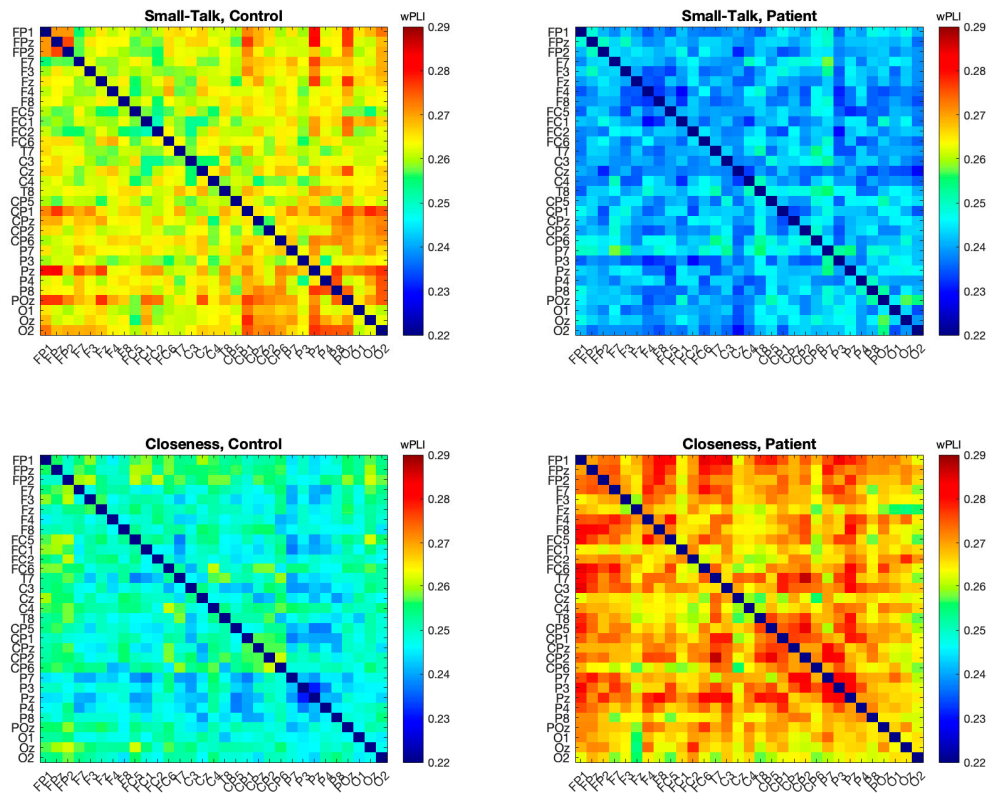

**Figure S2**

*Average Adjacency Matrix for the Theta Frequency Band*

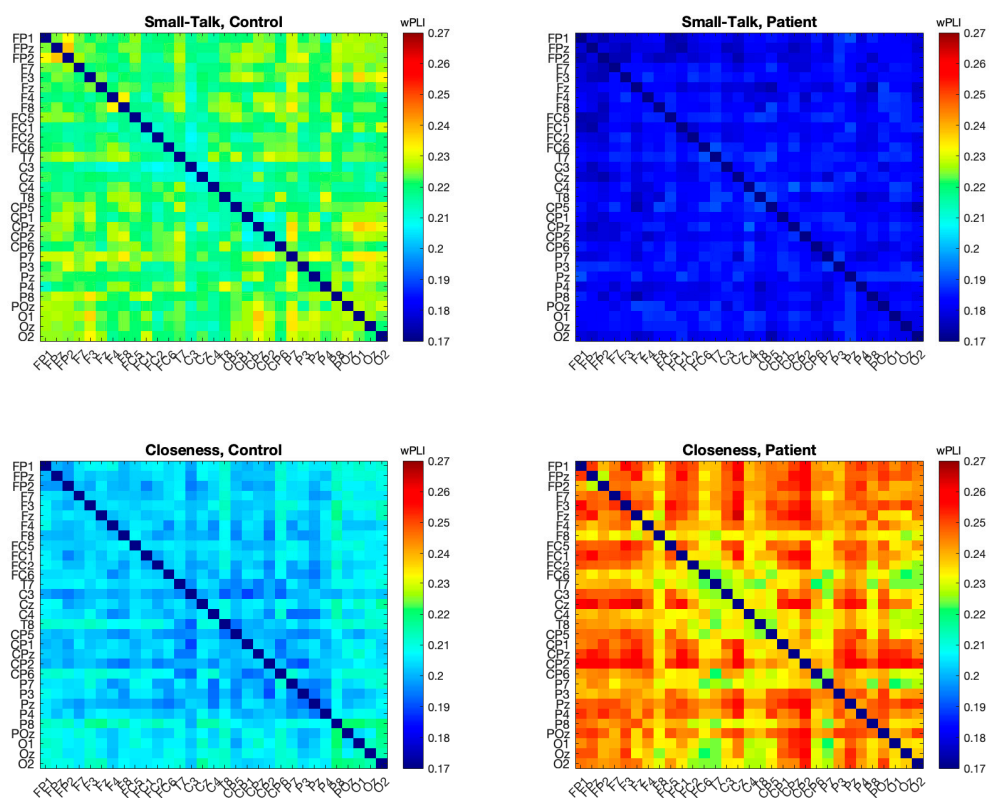

### Figure S3

*Average Adjacency Matrix for the Alpha Frequency Band*

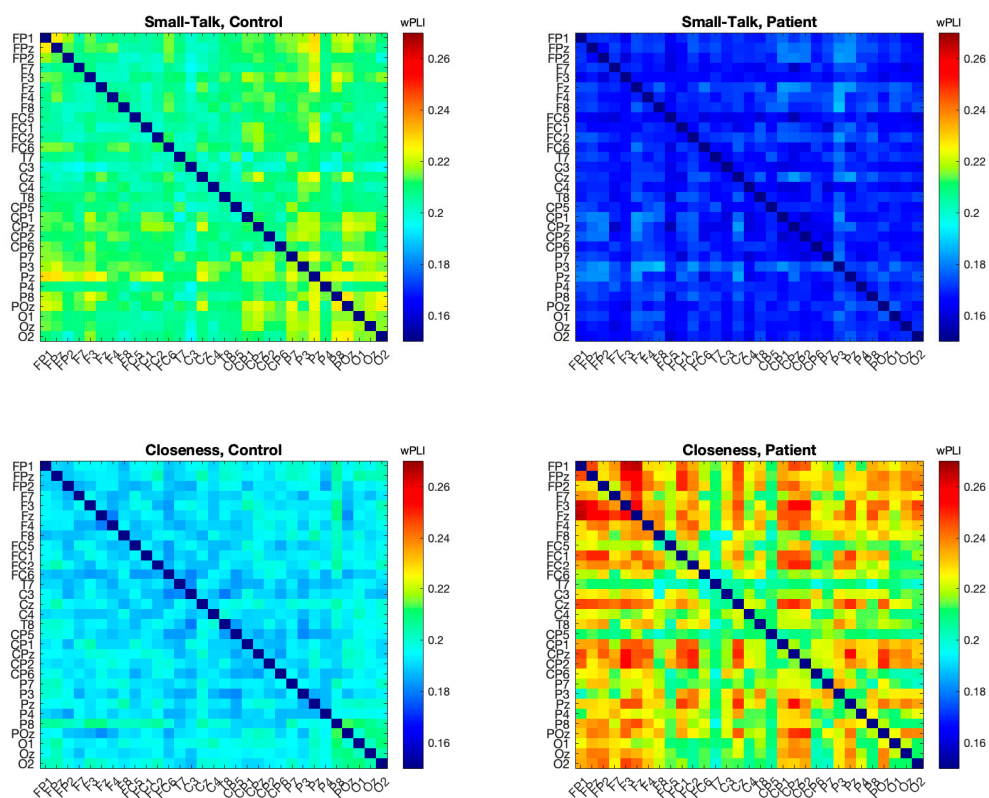

**Figure S4**

*Average Adjacency Matrix for the Beta Frequency Band*

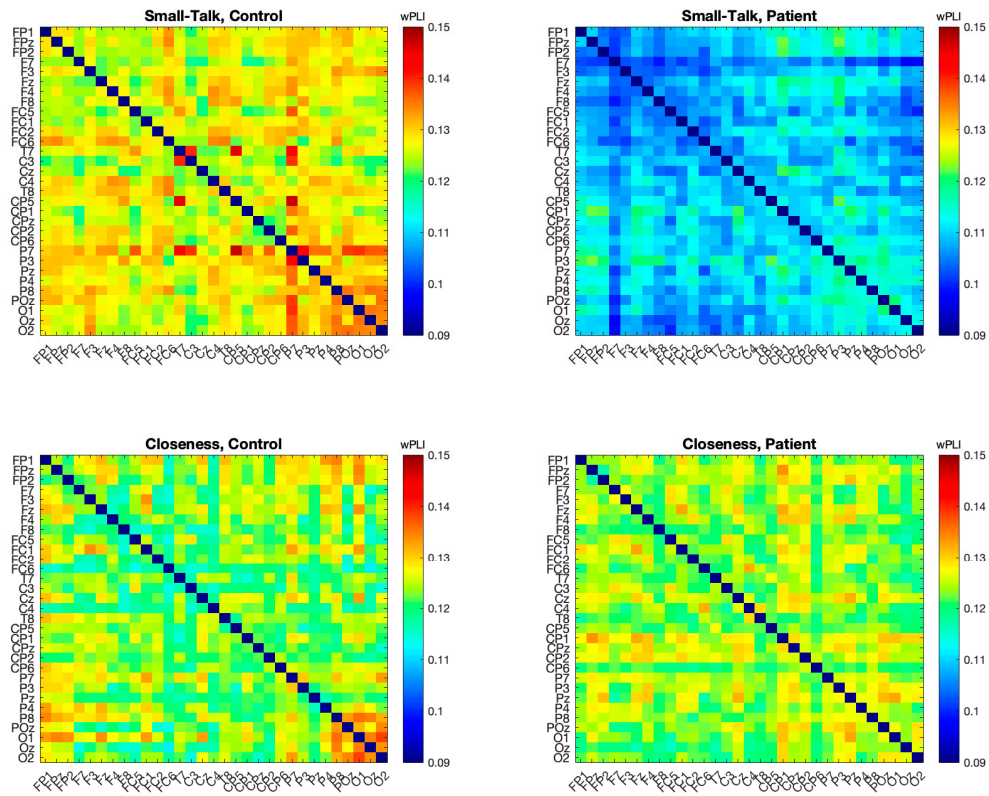

**Figure S5***Average Adjacency Matrix for the Gamma Frequency Band*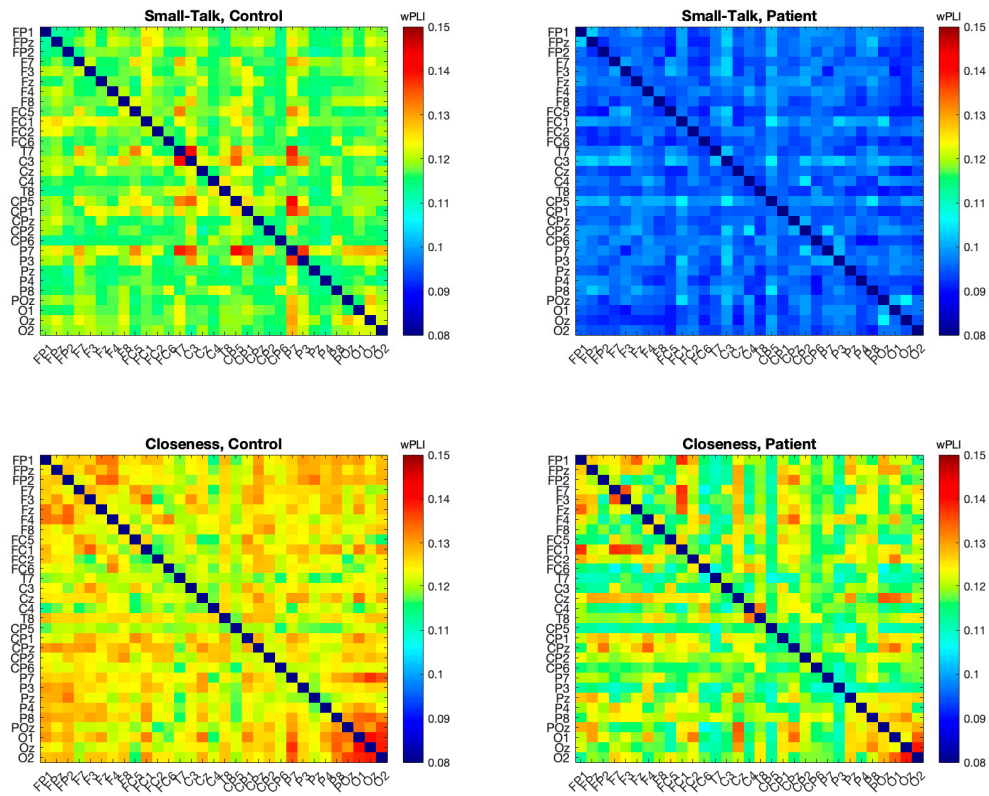

Supplement: s1 [file s1]
